# Supplementary material for: Au(iii)-Proline derivatives exhibiting selective antiproliferative activity against HepG2/SB3 apoptosis-resistant cancer cells
Source: Royal Society of Chemistry journal article supplement (doi:10.1039/c9dt03036k), 2019-01-01
Supplement: c9dt03036k1.pdf [file c9dt03036k1.pdf]

## Au(III)-proline derivatives exhibiting selective antiproliferative activity against HepG2/SB3 apoptosis-resistant cancer cells

Leonardo Brustolin,<sup>[a][b]</sup> Nicolò Pettenuzzo,<sup>[a][b]</sup> Chiara Nardon,<sup>[a]</sup> Santina Quarta,<sup>[c]</sup> Luciano Marchiò,<sup>[d]</sup> Barbara Biondi<sup>[e]</sup>, Patrizia Pontisso,<sup>[c]</sup> and Dolores Fregona\*<sup>[a]</sup>

<sup>[a]</sup> Department of Chemical Sciences, University of Padova, Via F. Marzolo 1, 35131 Padova (Italy)

<sup>[b]</sup> Department of Chirurgical, Oncologic and Gastroenterological Sciences, University of Padova, Via Giustiniani 2, 35128, Padova (Italy)

<sup>[c]</sup> Department of Medicine, University of Padova, Via Giustiniani 2, 35128, Padova (Italy)

<sup>[d]</sup> Department of Chemical Sciences, Life Sciences and Environmental Sustainability, University of Parma, Parco Area delle Scienze 11/a, 43124, Parma (Italy)

<sup>[e]</sup> CNR, Padova Unit, Inst Biomol Chem, Via Marzolo 1, I-35131 Padua, Italy

\*Author to whom correspondence may be addressed: dolores.fregona@unipd.it

### X-ray crystallographic parameters

|                          | [AuCl <sub>2</sub> (ProOtBuDTC)] (4)                                             | [AuBr <sub>2</sub> (ProOMeDTC)] (5)                                             | [AuBr <sub>2</sub> (ProOtBuDTC)] (6)                                             |
|--------------------------|----------------------------------------------------------------------------------|---------------------------------------------------------------------------------|----------------------------------------------------------------------------------|
| <b>Empirical formula</b> | C <sub>10</sub> H <sub>16</sub> AuCl <sub>2</sub> NO <sub>2</sub> S <sub>2</sub> | C <sub>7</sub> H <sub>10</sub> AuBr <sub>2</sub> NO <sub>2</sub> S <sub>2</sub> | C <sub>10</sub> H <sub>16</sub> AuBr <sub>2</sub> NO <sub>2</sub> S <sub>2</sub> |
| <b>Formula weight</b>    | 514.22                                                                           | 561.07                                                                          | 603.14                                                                           |
| <b>Temperature/K</b>     | 200(2)                                                                           | 293(2)                                                                          | 293(2)                                                                           |
| <b>Crystal system</b>    | monoclinic                                                                       | orthorhombic                                                                    | monoclinic                                                                       |
| <b>Space group</b>       | P2 <sub>1</sub>                                                                  | P2 <sub>1</sub> 2 <sub>1</sub> 2 <sub>1</sub>                                   | P2 <sub>1</sub>                                                                  |
| <b>a/Å</b>               | 6.8275(2)                                                                        | 7.197(2)                                                                        | 6.985(2)                                                                         |
| <b>b/Å</b>               | 22.0294(7)                                                                       | 14.315(3)                                                                       | 22.283(7)                                                                        |
| <b>c/Å</b>               | 10.7863(3)                                                                       | 26.370(5)                                                                       | 11.048(3)                                                                        |

|                                  |                    |                    |                    |
|----------------------------------|--------------------|--------------------|--------------------|
| $\alpha/^\circ$                  | 90                 | 90                 | 90                 |
| $\beta/^\circ$                   | 101.659(1)         | 90                 | 102.358(5)         |
| $\gamma/^\circ$                  | 90                 | 90                 | 90                 |
| Volume/ $\text{\AA}^3$           | 1588.85(8)         | 2716.8(11)         | 1679.7(8)          |
| Z                                | 4                  | 8                  | 4                  |
| $\rho_{\text{calc}}/\text{cm}^3$ | 2.150              | 2.743              | 2.385              |
| $\mu/\text{mm}^{-1}$             | 9.851              | 17.001             | 13.758             |
| F(000)                           | 976.0              | 2048.0             | 1120.0             |
| Crystal size/ $\text{mm}^3$      | 0.21 × 0.16 × 0.06 | 0.42 × 0.12 × 0.10 | 0.28 × 0.05 × 0.05 |
| 2 $\theta$ range ( $^\circ$ )    | 6.368 to 52.058    | 3.088 to 51.696    | 3.656 to 51.998    |
| Reflections collected/unique     | 22908/6215         | 31186/5231         | 14950/6537         |
| Data/restraints/ parameters      | 6215/2/331         | 5231/0/273         | 6537/1/331         |
| Goodness-of-fit on $F^2$         | 0.919              | 1.009              | 0.946              |
| $R_1 [I \geq 2\sigma(I)]$        | 0.0173             | 0.0369             | 0.0436             |
| $wR_2 [I \geq 2\sigma(I)]$       | 0.0352             | 0.0783             | 0.0805             |
| Flack parameter                  | 0.011(4)           | 0.021(8)           | -0.002(12)         |

**Table SI 1** Summary of X-ray crystallographic data for [AuBr<sub>2</sub>(ProOMeDTC)] (4), [AuCl<sub>2</sub>(ProOtBuDTC)] (5), [AuBr<sub>2</sub>(ProOtBuDTC)] (6).

$R_1 = \sum ||F_o| - |F_c|| / \sum |F_o|$ ,  $wR_2 = [\sum [w(F_o^2 - F_c^2)^2] / \sum [w(F_o^2)^2]]^{1/2}$ ,  $w = 1 / [\sigma^2(F_o^2) + (aP)^2 + bP]$ , where  $P = [\max(F_o^2, 0) + 2F_c^2] / 3$ .

| [AuCl <sub>2</sub> (ProOtBuDTC)] (4) |          | [AuBr <sub>2</sub> (ProOMeDTC)] (5) |          | [AuBr <sub>2</sub> (ProOMeDTC)] (4) |          |
|--------------------------------------|----------|-------------------------------------|----------|-------------------------------------|----------|
| Au(1)-S(11)                          | 2.309(2) | Au(1)-S(11)                         | 2.316(4) | Au(1)-S(11)                         | 2.323(5) |
| Au(1)-S(21)                          | 2.294(2) | Au(1)-S(21)                         | 2.315(4) | Au(1)-S(21)                         | 2.305(5) |
| Au(1)-Cl(1)                          | 2.311(2) | Au(1)-Br(1)                         | 2.436(2) | Au(1)-Br(1)                         | 2.441(2) |
| Au(1)-Cl(2)                          | 2.307(2) | Au(1)-Br(2)                         | 2.435(2) | Au(1)-Br(2)                         | 2.436(2) |
| Au(2)-S(12)                          | 2.298(2) | Au(2)-S(12)                         | 2.301(4) | Au(2)-S(12)                         | 2.314(5) |
| Au(2)-S(22)                          | 2.305(2) | Au(2)-S(22)                         | 2.324(4) | Au(2)-S(22)                         | 2.315(5) |
| Au(2)-Cl(3)                          | 2.311(2) | Au(2)-Br(3)                         | 2.441(2) | Au(2)-Br(3)                         | 2.435(2) |
| Au(2)-Cl(4)                          | 2.300(2) | Au(2)-Br(4)                         | 2.441(2) | Au(2)-Br(4)                         | 2.427(2) |

**Table SI 2** Selected geometric parameters (Å) for [AuCl<sub>2</sub>(ProOtBuDTC)] (4), [AuBr<sub>2</sub>(ProOMeDTC)] (5), [AuBr<sub>2</sub>(ProOtBuDTC)] (6).

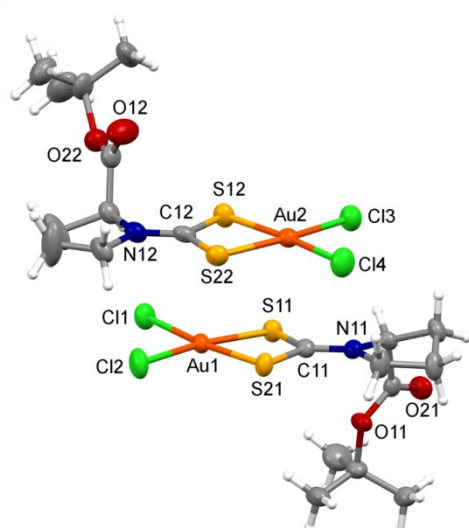

**Fig. SI 1** Molecular structure of the complex 4 with thermal ellipsoids drawn at the **50% probability** level. Both molecular entities within the asymmetric unit are shown. CCDC 1845775.

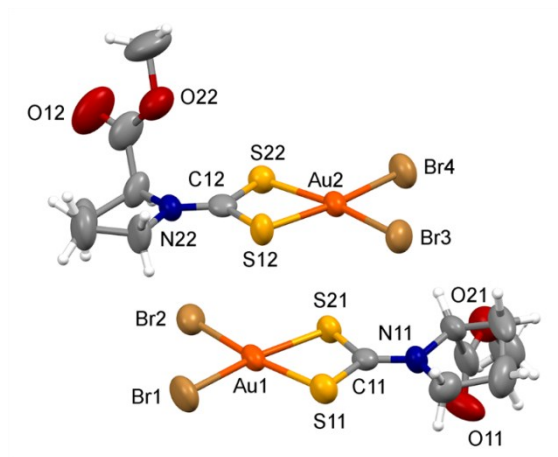

**Fig. SI 2** Molecular structure of the complex **5** with thermal ellipsoids drawn at the **50% probability** level. Both molecular entities within the asymmetric unit are shown. CCDC 1845776.

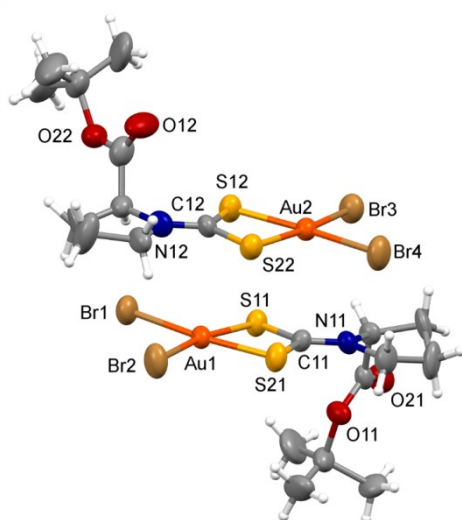

**Fig. SI 3** Molecular structure of the complex **6** with thermal ellipsoids drawn at the **50% probability** level. Both molecular entities within the asymmetric unit are shown. CCDC 1845777.

## IR spectra

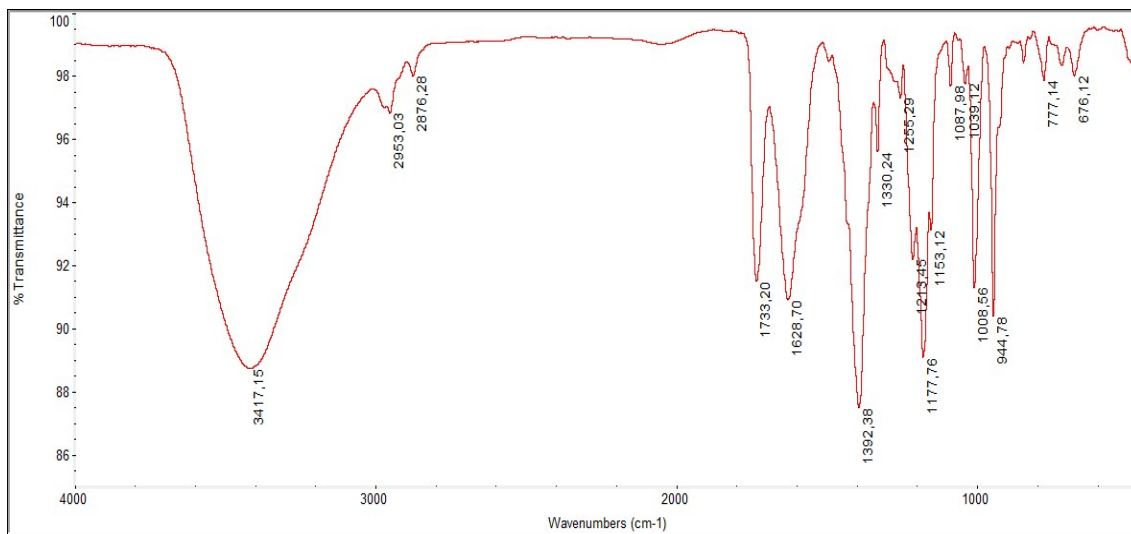

**Fig. SI 4** Medium FT-IR (4000-500 cm<sup>-1</sup>, KBr) spectrum of L-proline methyl ester dithiocarbamate sodium salt (Na ProOMeDTC).

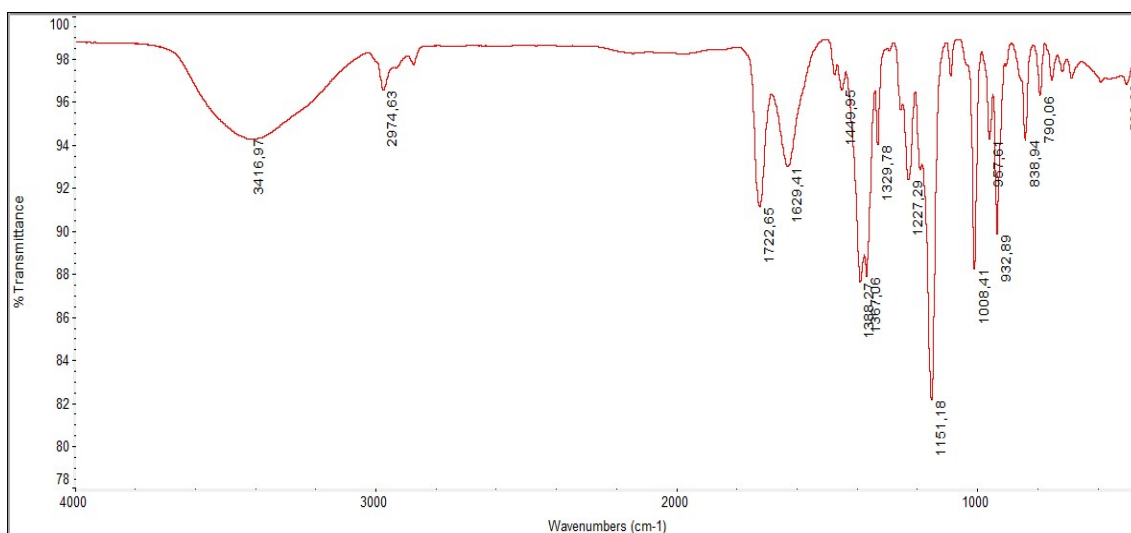

**Fig. SI 5** Medium FT-IR (4000-500 cm<sup>-1</sup>, KBr) spectrum of L-proline *tert*-butyl ester dithiocarbamate sodium salt (Na ProOtBuDTC).

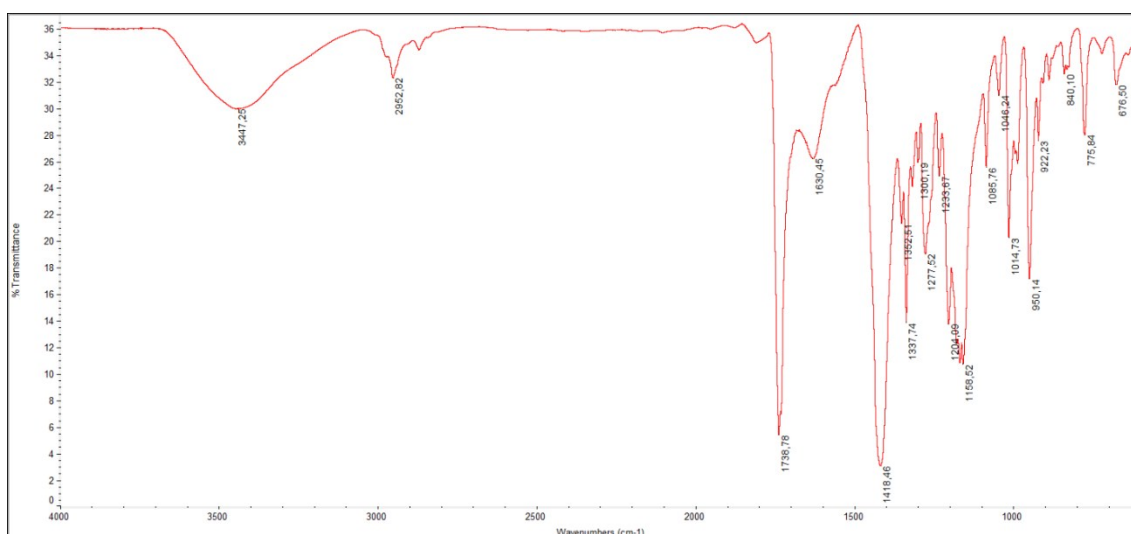

**Fig. SI 6** Medium FT-IR (4000-600  $\text{cm}^{-1}$ , KBr) spectrum of bis(L-proline methyl ester dithiocarbamate)digold(I),  $[\text{Au}_2(\text{ProOMeDTC})_2]$  (**1**).

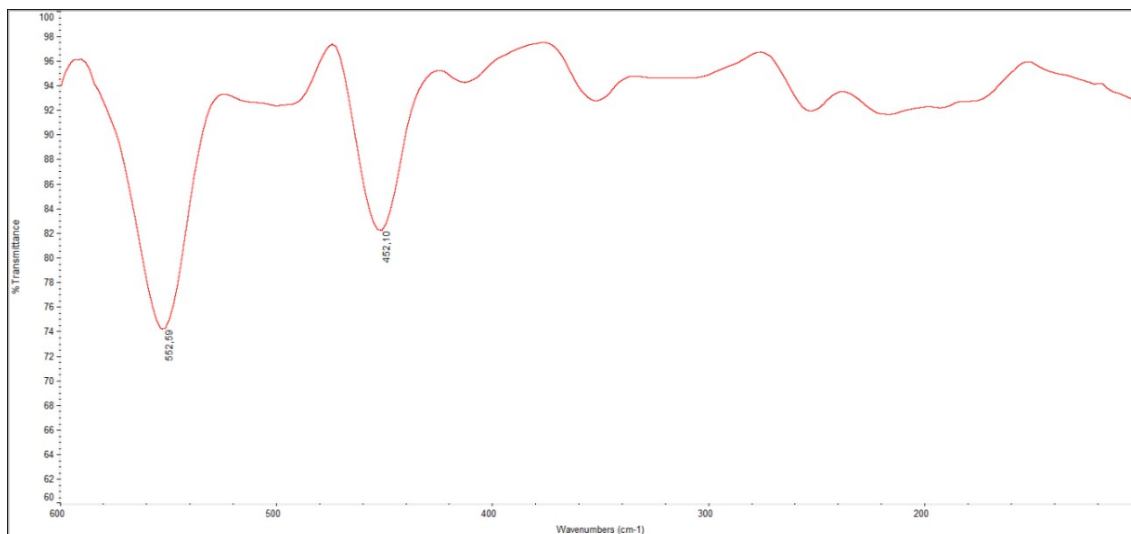

**Fig. SI 7** Far FT-IR (600-100  $\text{cm}^{-1}$ , nujol) spectrum of bis(L-proline methyl ester dithiocarbamate)digold(I),  $[\text{Au}_2(\text{ProOMeDTC})_2]$  (**1**).

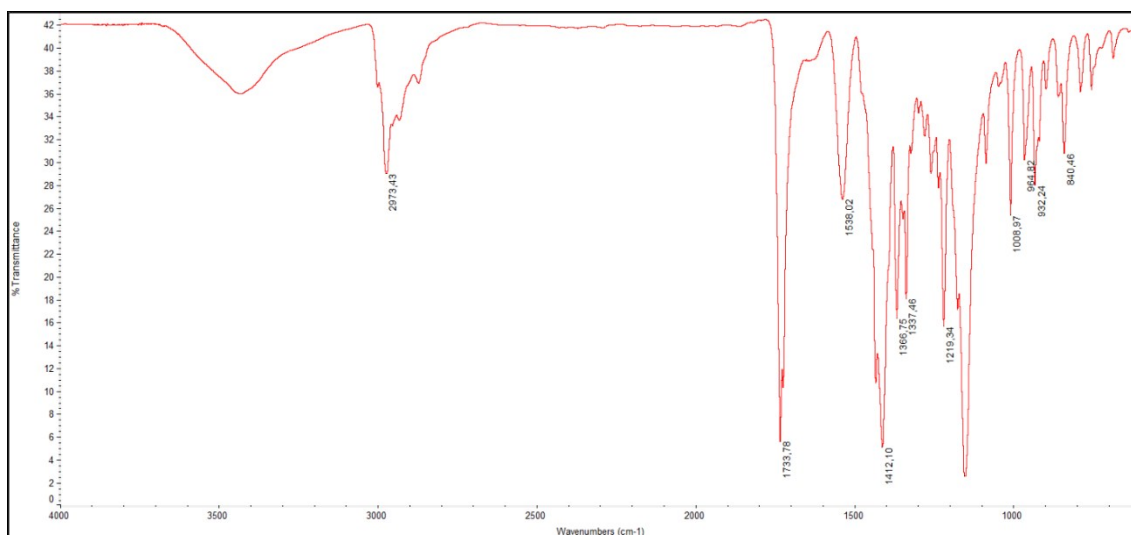

**Fig. SI 8** Medium FT-IR (4000-600  $\text{cm}^{-1}$ , KBr) spectrum of bis(L-proline *tert*-butyl ester dithiocarbamate)digold(I),  $[\text{Au}_2(\text{ProOtBuDTC})_2]$  (**2**).

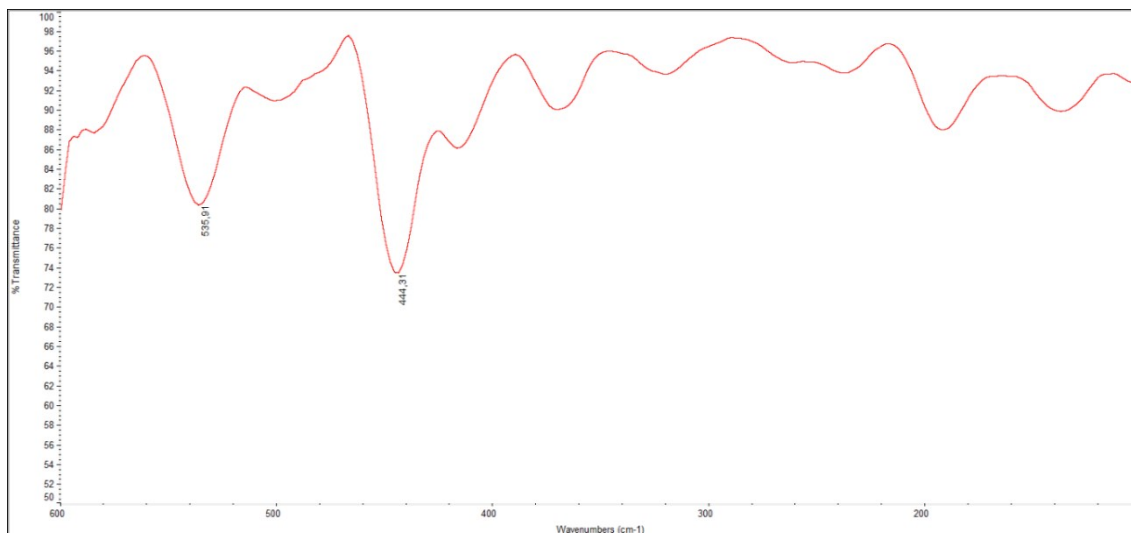

**Fig. SI 9** Far FT-IR (600-100  $\text{cm}^{-1}$ , nujol) spectrum of bis(L-proline *tert*-butyl ester dithiocarbamate)digold(I),  $[\text{Au}_2(\text{ProOtBuDTC})_2]$  (**2**).

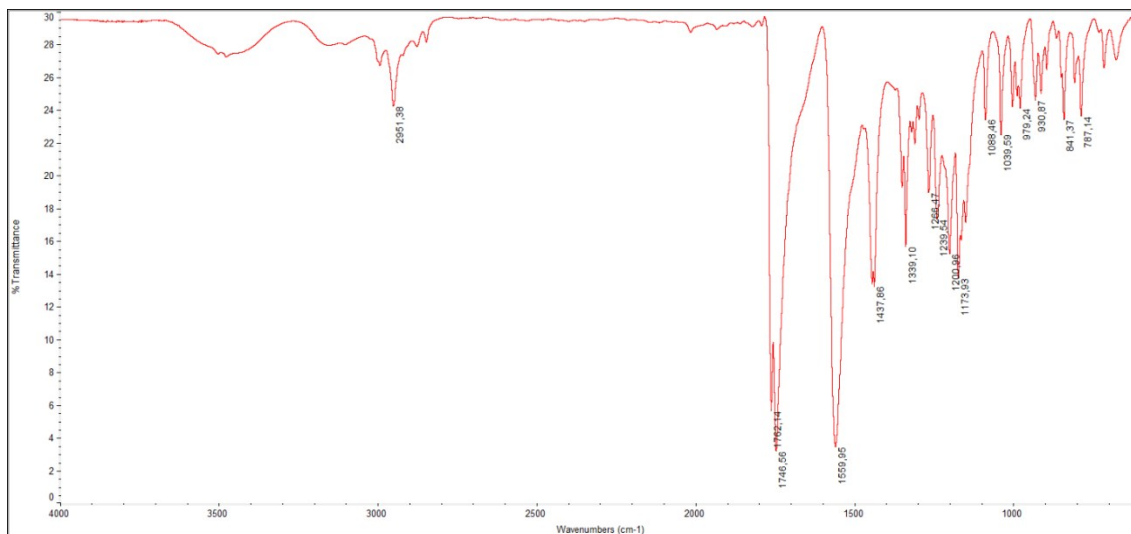

**Fig. SI 10** Medium FT-IR (4000-600  $\text{cm}^{-1}$ , KBr) spectrum of dichloro(L-proline methyl ester dithiocarbamate)gold(III),  $[\text{AuCl}_2(\text{ProOMeDTC})]$  (**3**).

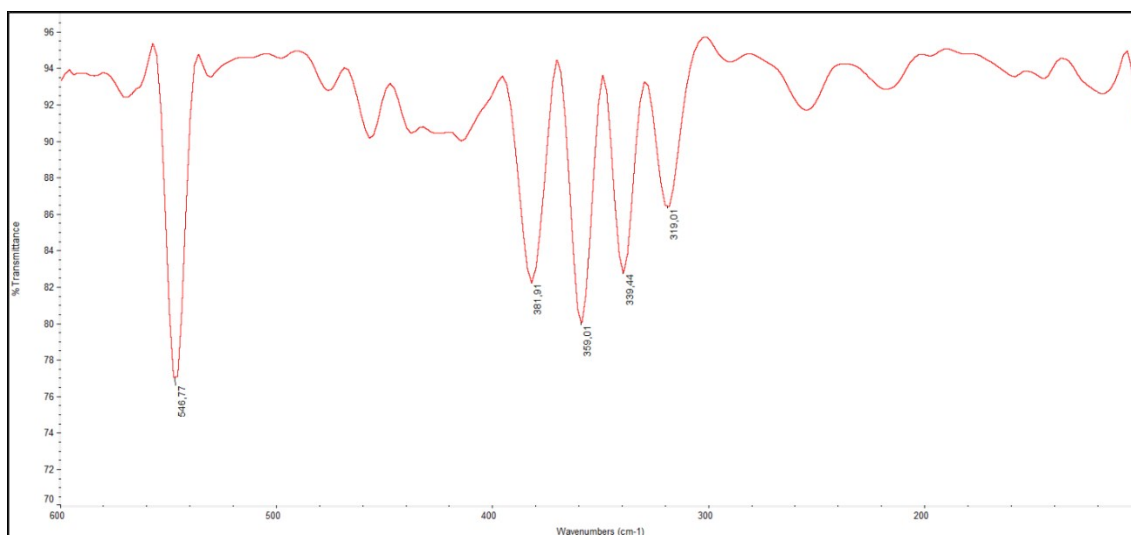

**Fig. SI 11** Far FT-IR (600-100  $\text{cm}^{-1}$ , nujol) spectrum of dichloro(L-proline methyl ester dithiocarbamate)gold(III),  $[\text{AuCl}_2(\text{ProOMeDTC})]$  (**3**).

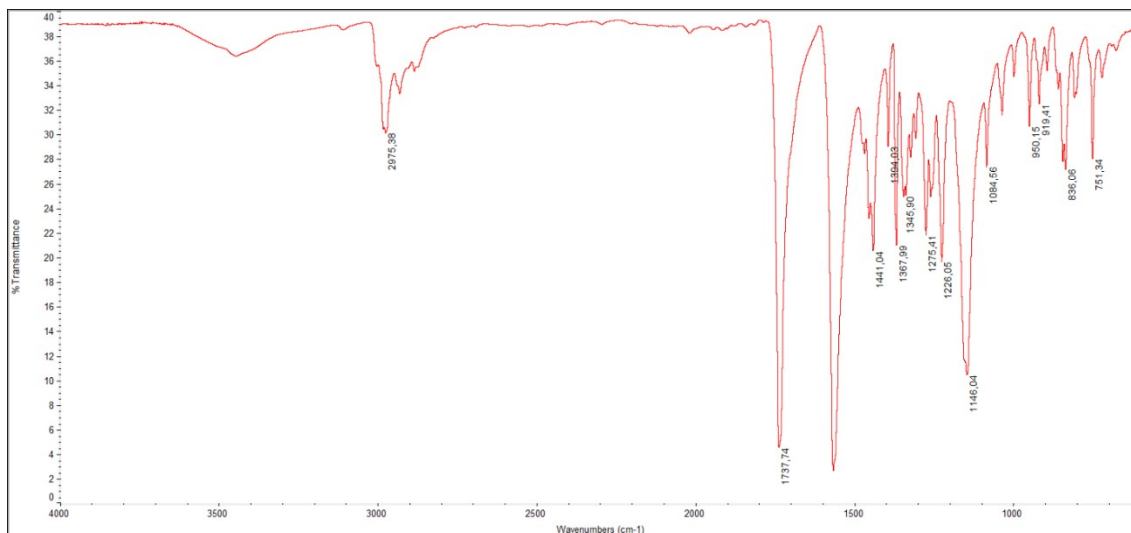

**Fig. SI 12** Medium FT-IR (4000-600  $\text{cm}^{-1}$ , KBr) spectrum of dichloro(L-proline *tert*-butyl ester dithiocarbamate)gold(III),  $[\text{AuCl}_2(\text{ProOtBuDTC})]$  (4).

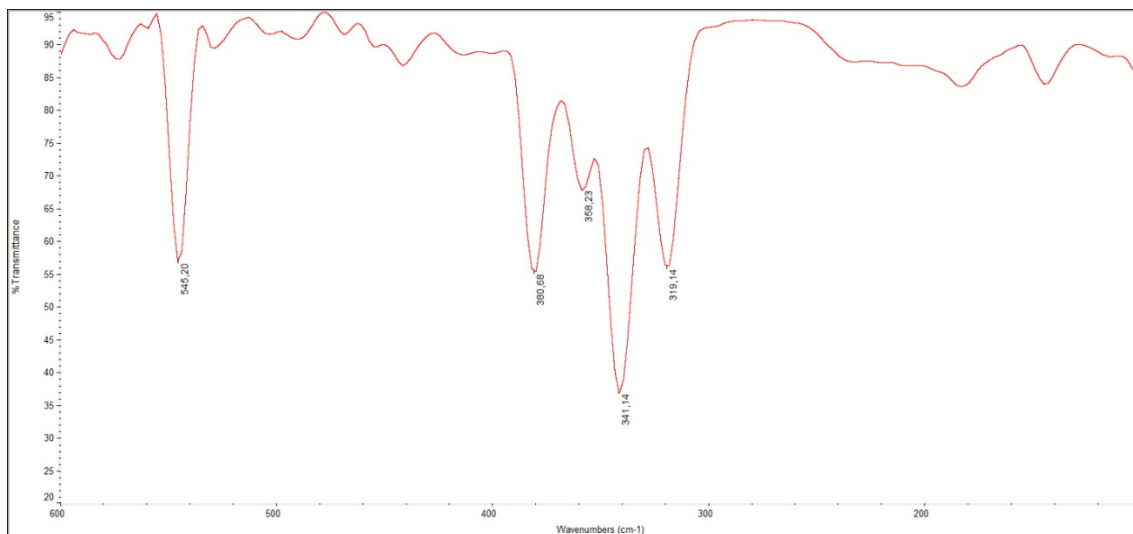

**Fig. SI 13** Far FT-IR (600-100  $\text{cm}^{-1}$ , nujol) spectrum of dichloro(L-proline *tert*-butyl ester dithiocarbamate)gold(III),  $[\text{AuCl}_2(\text{ProOtBuDTC})]$  (4).

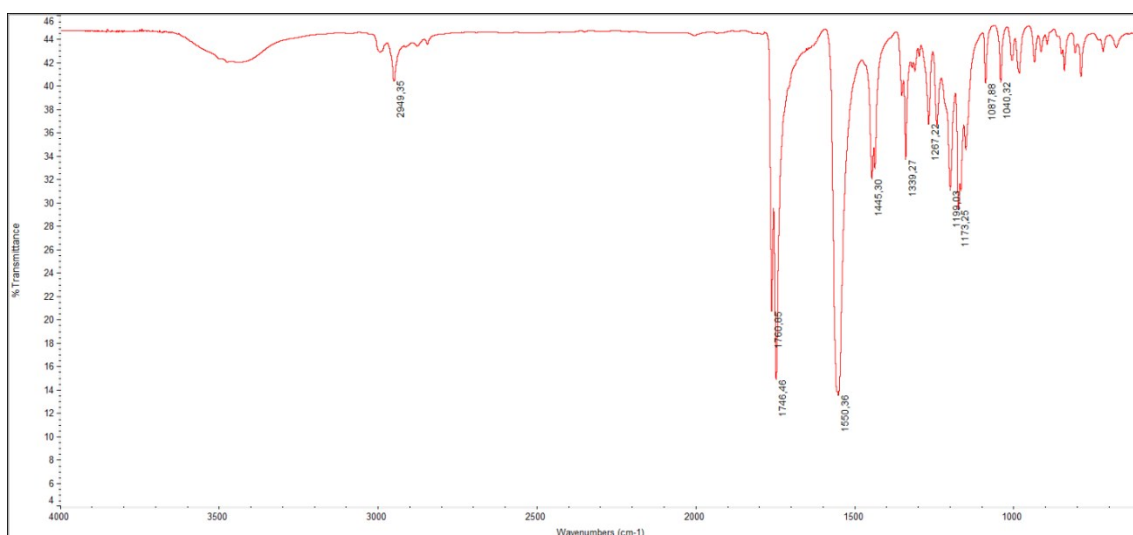

**Fig. SI 14** Medium FT-IR (4000-600  $\text{cm}^{-1}$ , KBr) spectrum of dibromo(L-proline methyl ester dithiocarbamate)gold(III),  $[\text{AuBr}_2(\text{ProOMeDTC})]$  (5).



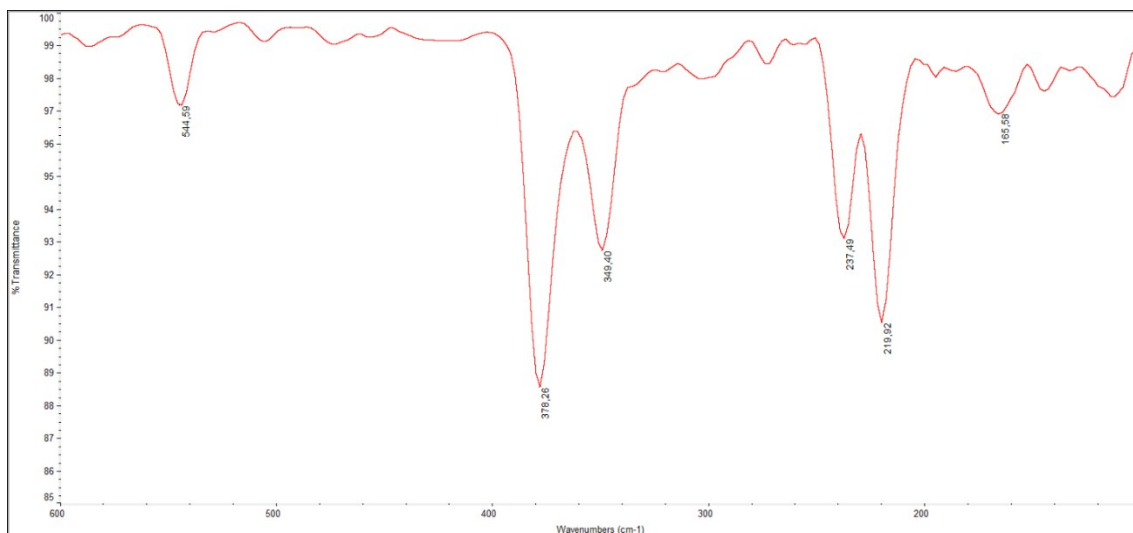

**Fig. SI 15** Far FT-IR (600-100  $\text{cm}^{-1}$ , nujol) spectrum of dibromo(L-proline methyl ester dithiocarbamate)gold(III),  $[\text{AuBr}_2(\text{ProOMeDTC})]$  (5).

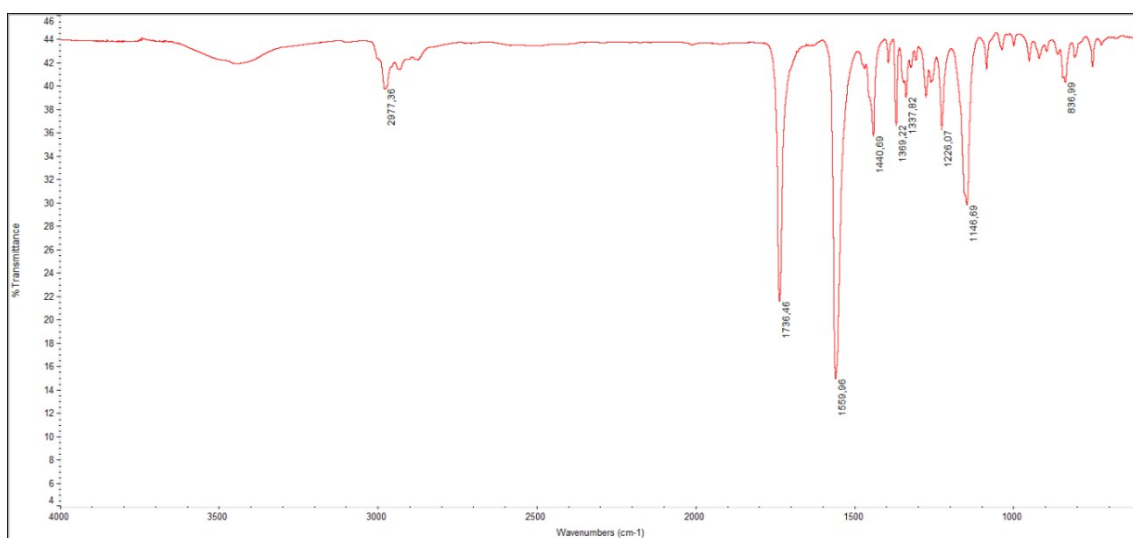

**Fig. SI 16** Medium FT-IR (4000-600  $\text{cm}^{-1}$ , KBr) spectrum of dibromo(L-proline *tert*-butyl ester dithiocarbamate)gold(III),  $[\text{AuBr}_2(\text{ProOtBuDTC})]$  (6).

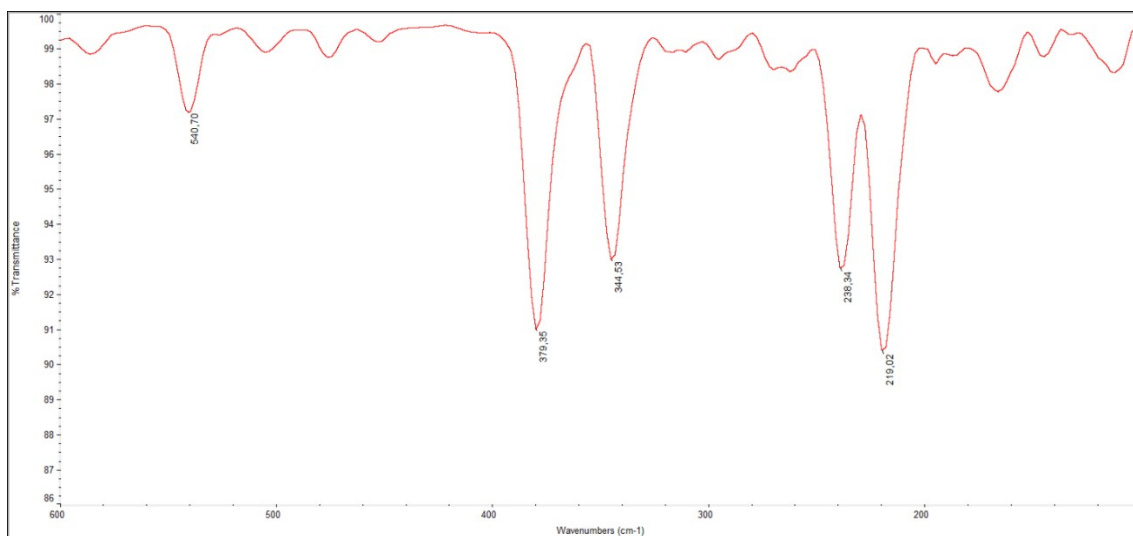

**Fig. SI 17** Far FT-IR (600-100  $\text{cm}^{-1}$ , nujol) spectrum of dibromo(L-proline *tert*-butyl ester dithiocarbamate)gold(III),  $[\text{AuBr}_2(\text{ProOtBuDTC})]$  (6).

## <sup>1</sup>H-NMR spectra

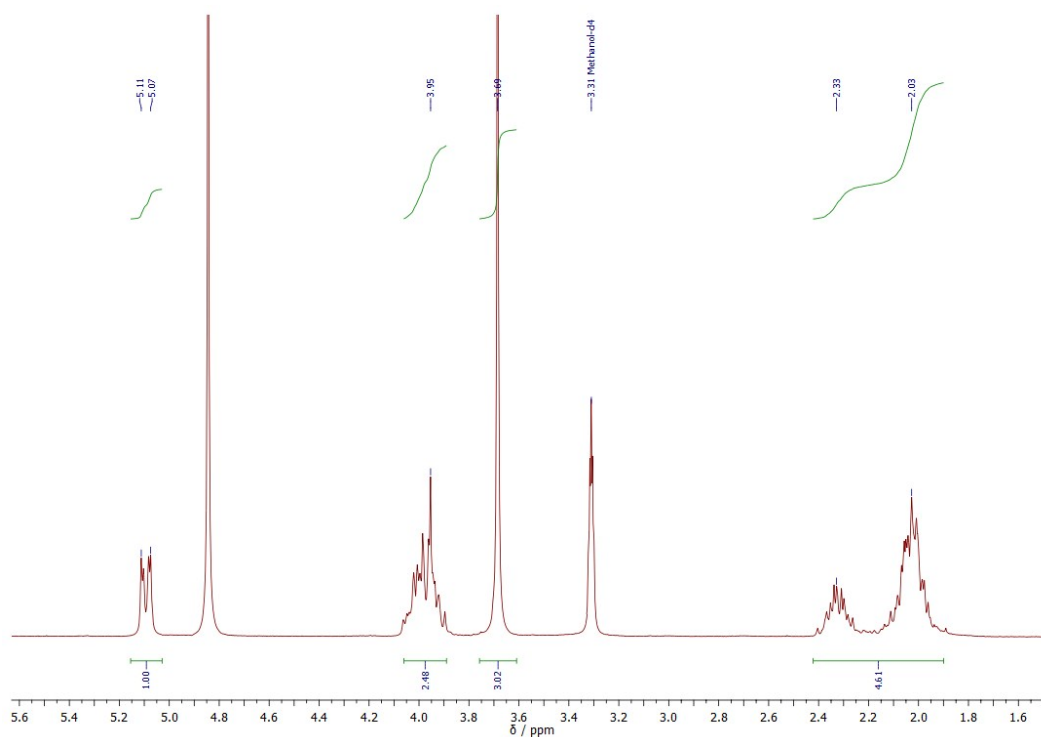

**Fig. SI 18** <sup>1</sup>H-NMR (CD<sub>3</sub>OD, 25 °C, 300.13 MHz) spectrum of L-proline methyl ester dithiocarbamate sodium salt (Na ProOMeDTC).

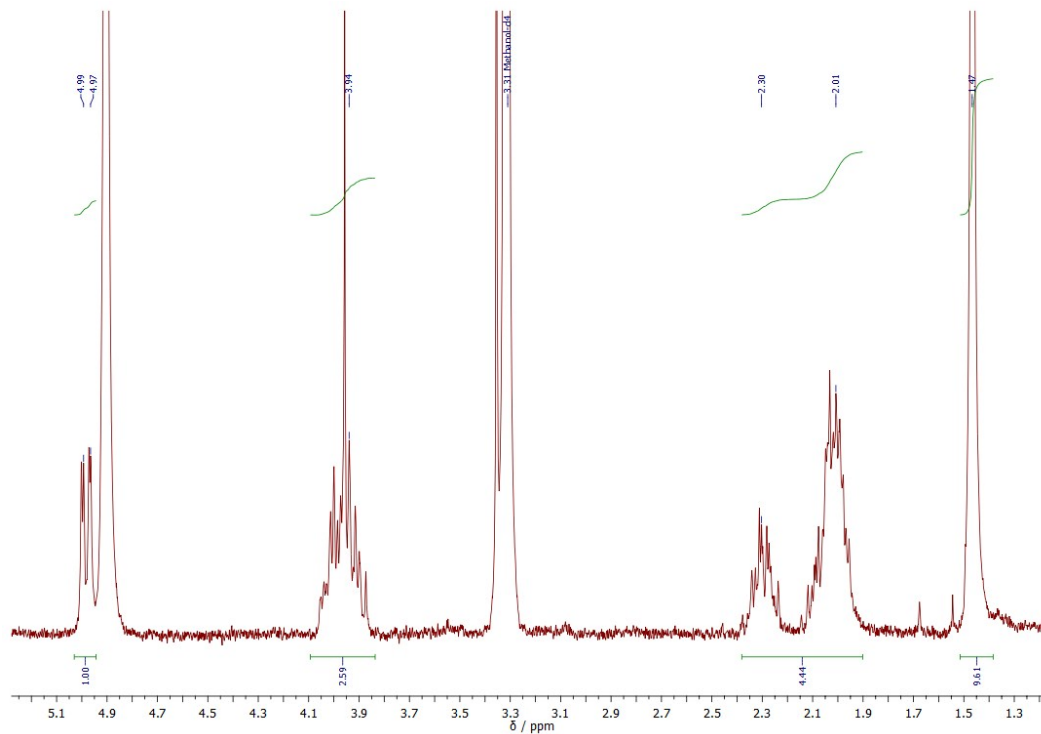

**Fig. SI 19** <sup>1</sup>H-NMR (CD<sub>3</sub>OD, 25 °C, 300.13 MHz) spectrum of L-proline *tert*-butyl ester dithiocarbamate sodium salt (Na ProOtBuDTC).

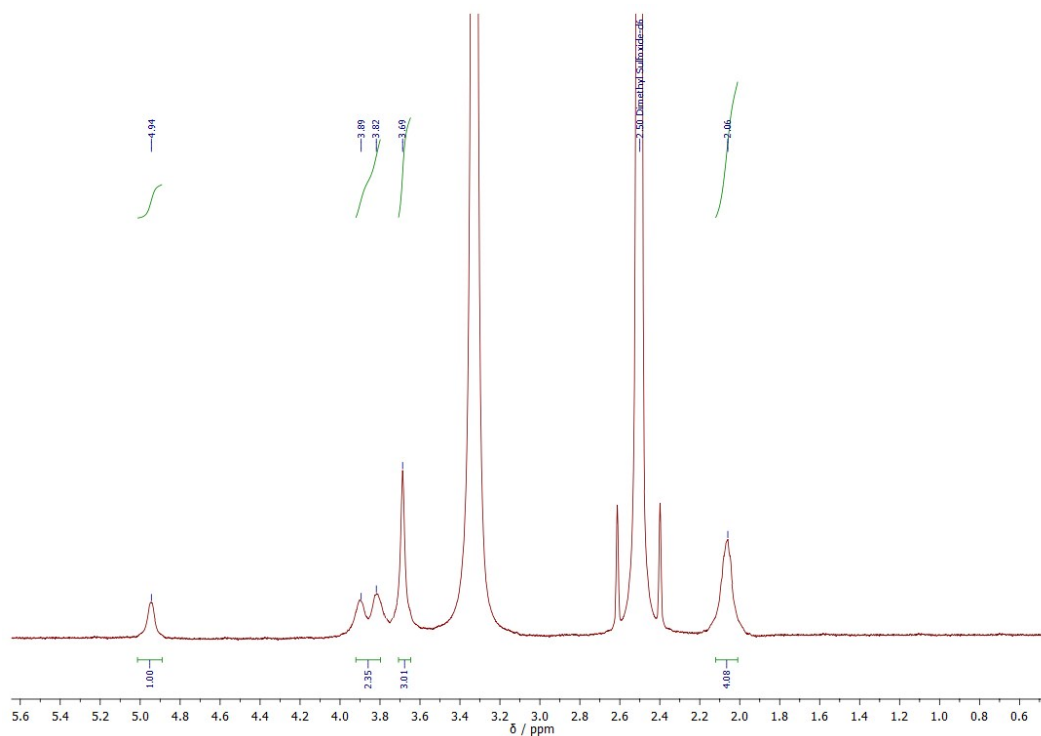

**Fig. SI 20** <sup>1</sup>H-NMR (DMSO-d<sub>6</sub>, 25 °C, 300.13 MHz) spectrum of bis(L-proline methyl ester dithiocarbamate)digold(I), [Au<sub>2</sub>(ProOMeDTC)<sub>2</sub>] (1).

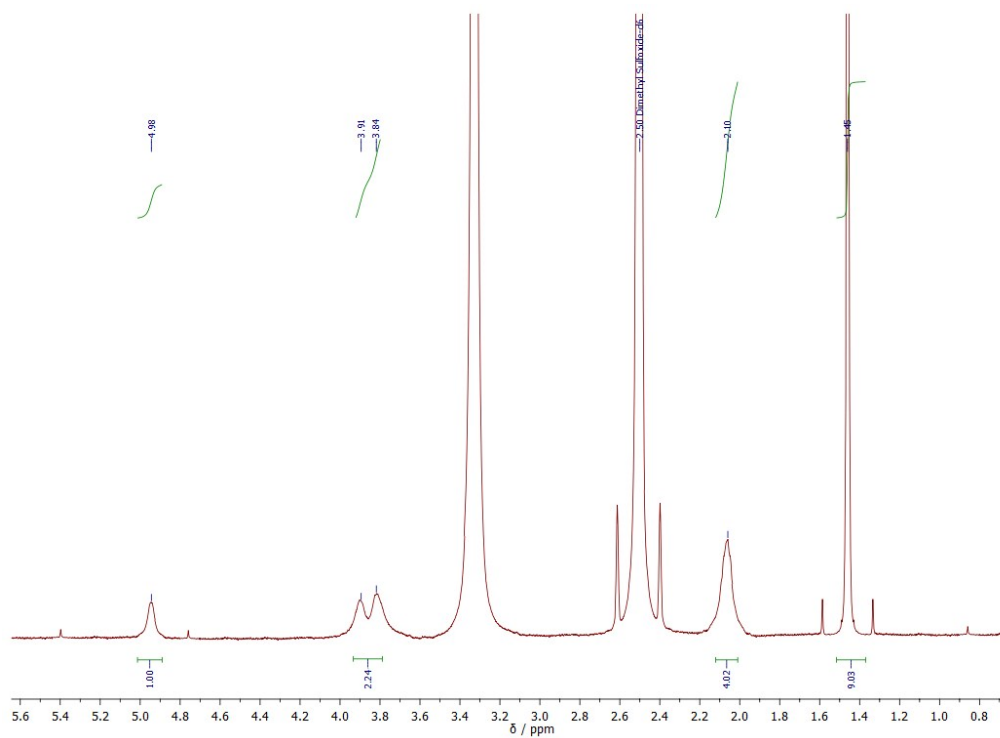

**Fig. SI 21** <sup>1</sup>H-NMR (DMSO-d<sub>6</sub>, 25 °C, 300.13 MHz) spectrum of bis(L-proline *tert*-butyl ester dithiocarbamate)digold(I), [Au<sub>2</sub>(ProOtBuDTC)<sub>2</sub>] (2).

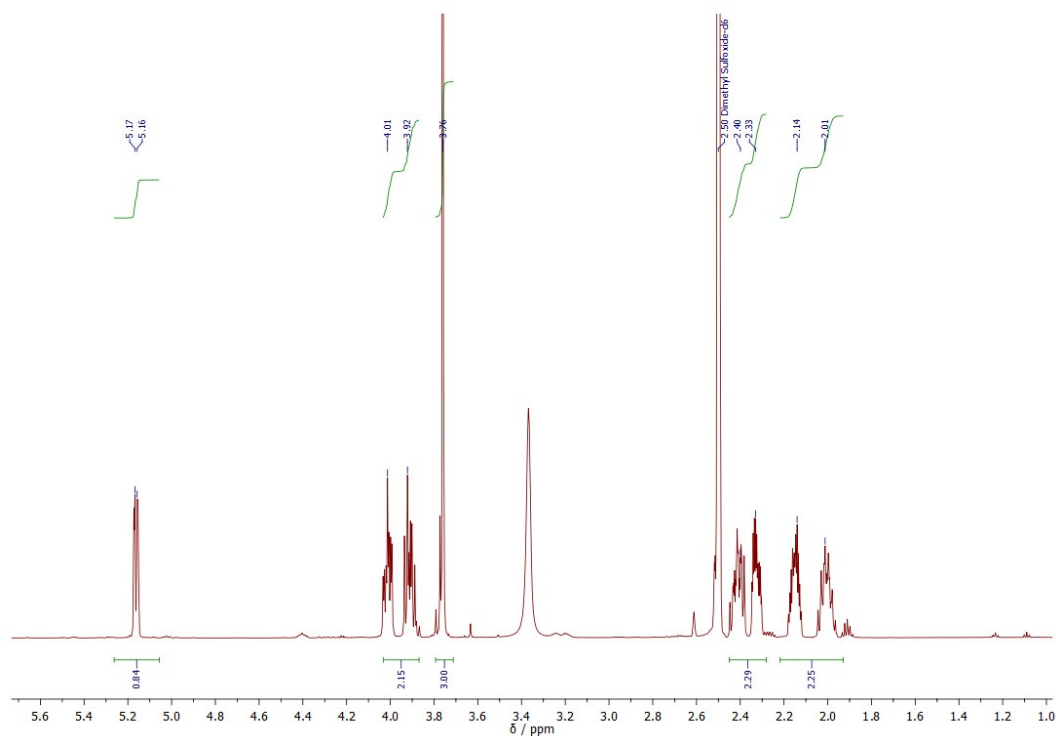

**Fig. SI 22**  $^1\text{H-NMR}$  ( $\text{DMSO-d}_6$ , 25  $^\circ\text{C}$ , 300.13 MHz) spectrum of dichloro(L-proline methyl ester dithiocarbamate)gold(III),  $[\text{AuCl}_2(\text{ProOMeDTC})]$  (**3**).

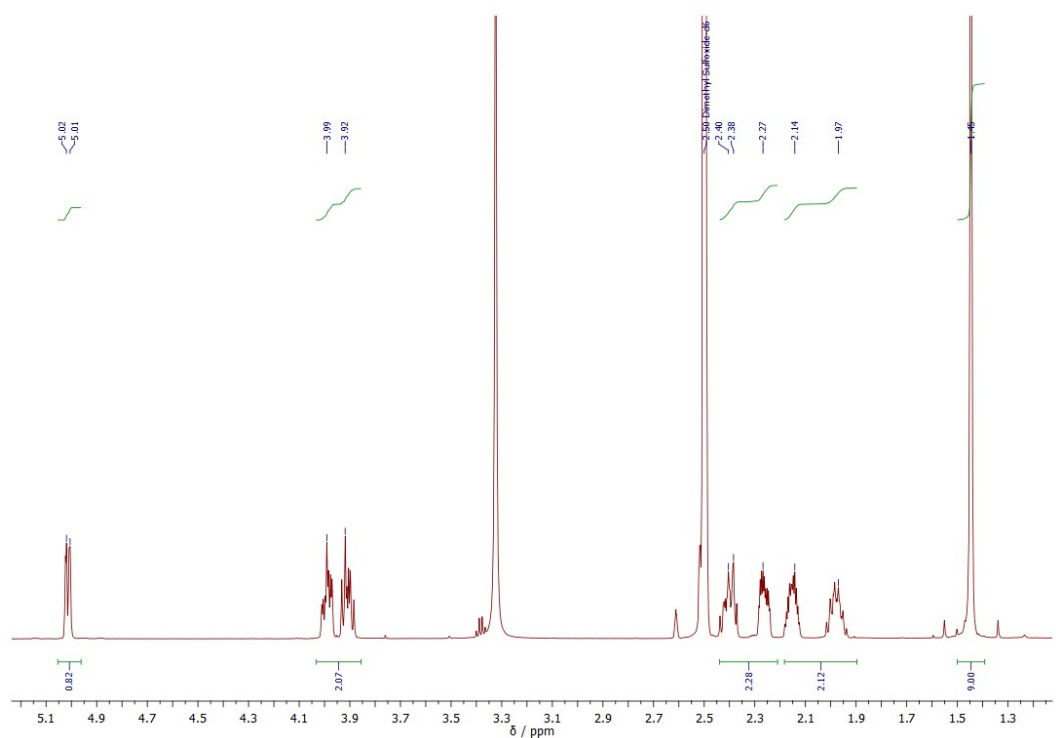

**Fig. SI 23**  $^1\text{H-NMR}$  ( $\text{DMSO-d}_6$ , 25  $^\circ\text{C}$ , 300.13 MHz) spectrum of dichloro(L-proline *tert*-butyl ester dithiocarbamate)gold(III),  $[\text{AuCl}_2(\text{ProOtBuDTC})]$  (**4**).

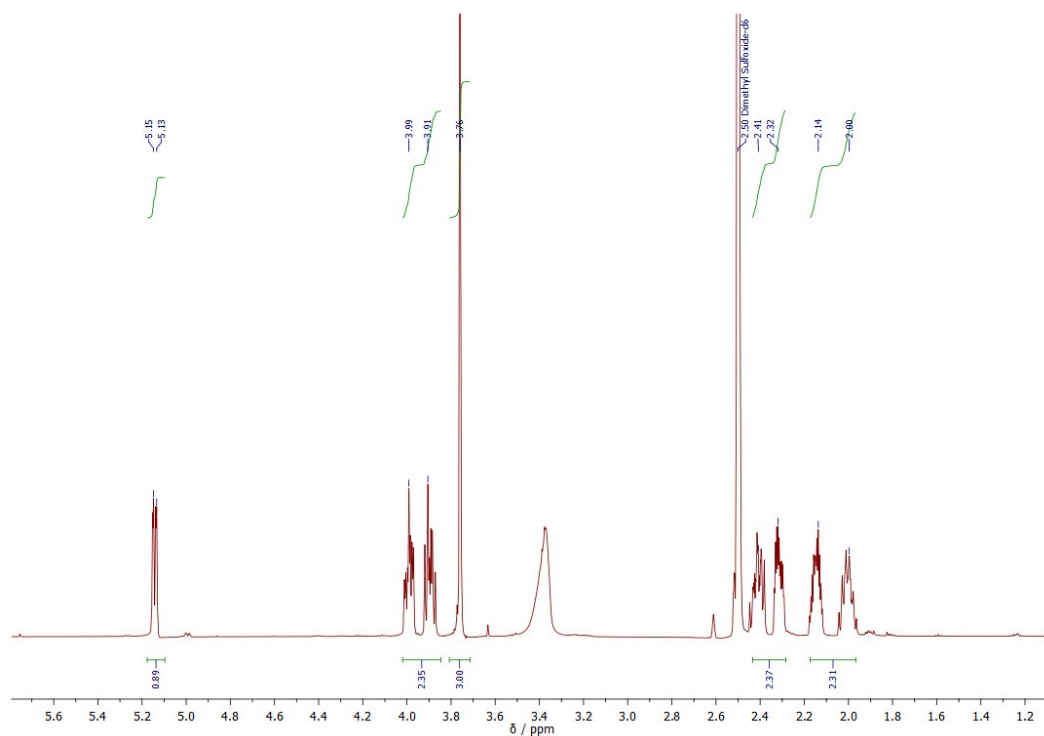

**Fig. SI 24.** <sup>1</sup>H-NMR (DMSO-d<sub>6</sub>, 25 °C, 300.13 MHz) spectrum of dibromo(L-proline methyl ester dithiocarbamate)gold(III), [AuBr<sub>2</sub>(ProOMeDTC)] (5).

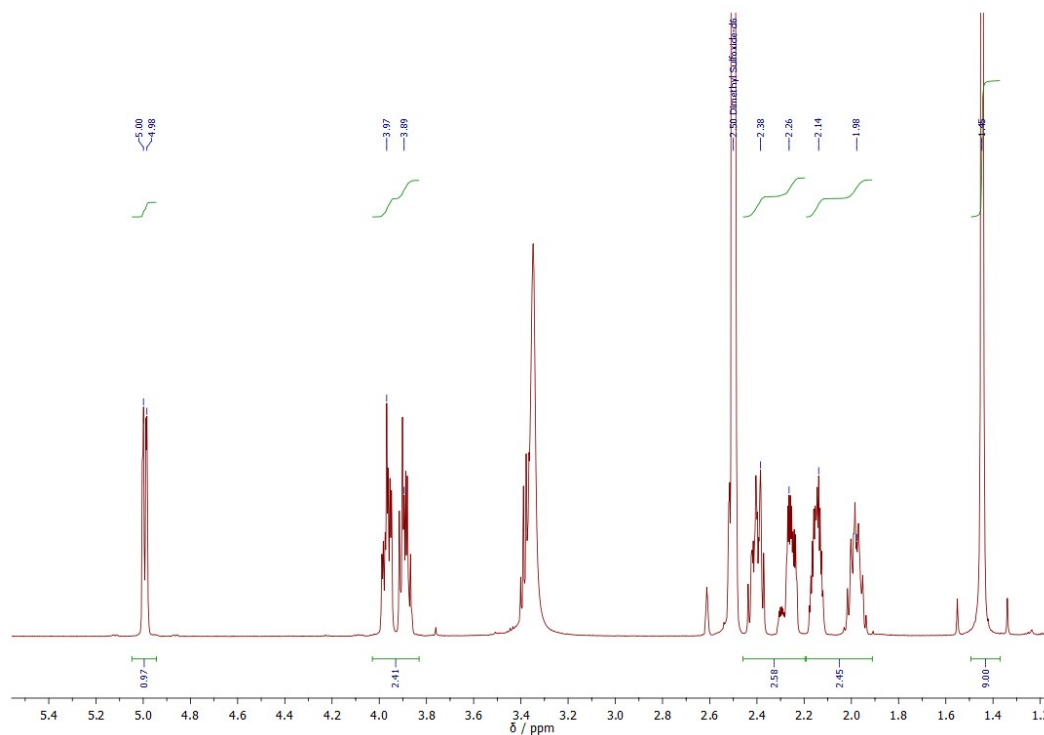

**Fig. SI 25** <sup>1</sup>H-NMR (DMSO-d<sub>6</sub>, 25 °C, 300.13 MHz) spectrum of dibromo(L-proline *tert*-butyl ester dithiocarbamate)gold(III), [AuBr<sub>2</sub>(ProOtBuDTC)] (6).

## UV-Vis studies

| Compound | band I         | band II        | band III       | band IV       | band V        |
|----------|----------------|----------------|----------------|---------------|---------------|
| <b>1</b> | -              | 284 nm (33581) | 326 nm (3382)  | -             | -             |
| <b>2</b> | -              | 284 nm (39678) | 324 nm (8314)  | -             | -             |
| <b>3</b> | n.d.           | n.d.           | 265 nm (27612) | 330 nm (2818) | 420 nm (329)  |
| <b>4</b> | n.d.           | n.d.           | 266 nm (29922) | 330 nm (3167) | 414 nm (334)  |
| <b>5</b> | 255 nm (25328) | 271 nm (27060) | 285 nm (28648) | 388 nm (2310) | 437 nm (1268) |
| <b>6</b> | 256 nm (24339) | 269 nm (25699) | 284 nm (28305) | 388 nm (2323) | 439 nm (1194) |

**Table SI 3** UV-Vis spectral data (800-235 nm) of complexes **1** and **2** in DMSO and **3-6** recorded in CH<sub>2</sub>Cl<sub>2</sub> at 25 °C. *n.d.* stands for “not detected”.

The summary of the bands is highlighted in **Table SI 3** and the spectra are reported in the following **Fig. SI 26-31**. In literature, the bands I, II and III have not been undoubtedly ascribed to a particular electronic transition, since they could be assigned to either an intra-ligand  $\pi^* \leftarrow \pi$  transition located in the -NCS moiety or an intra-ligand  $p \leftarrow d$  transition between levels originated by sulfur atoms.<sup>36</sup> Moreover, concerning the Au(I)-DTC derivatives, some papers associate the band III with a ligand-to-metal charge transfer (LMCT).<sup>37</sup> In these dinuclear complexes which involve an Au(I)-Au(I) interaction, metal-centered transitions are foreseen at low energy (range 300-350 nm), due to the destabilization of the highest occupied d orbitals of gold (which become antibonding).<sup>38</sup>

The discussion on bands IV and V of Au(III) derivatives is based on the Gray and Ballhausen's description of the molecular orbital theory for SP complexes, which discerns two distinct cases.<sup>39</sup> The first is related to SP compounds in which the ligands themselves have a  $\pi$ -orbital system, whereas the second is associated with SP complexes with no intra-ligand  $\pi$ -orbital system. For both cases, there are three spin-allowed d-d transitions, corresponding to the one-electron transitions  $^1A_{1g} \rightarrow ^1A_{2g}$ ,  $^1A_{1g} \rightarrow ^1B_{1g}$  and  $^1A_{1g} \rightarrow ^1E_g$ . Moreover, considering DTC ligands as moieties containing a  $\pi$ -orbital system, three charge-transfer (CT) transitions are foreseen, namely  $^1A_{1g} \rightarrow ^1E_u$ ,  $^1A_{1g} \rightarrow ^1A_{2u}$ , and  $^1A_{1g} \rightarrow ^1B_{1u}$ . However, only the first and second are allowed, with the  $^1A_{1g} \rightarrow ^1E_u$  transition expected to have considerably greater intensity. On the other hand, halido ligands belong to the second case presented, and in general generate two allowed CT transitions of the type  $^1A_{1g} \rightarrow ^1E_u$  (more intense) and  $^1A_{1g} \rightarrow ^1A_{2u}$ .<sup>39-41</sup> In general, the band IV is attributed to either an intramolecular  $L \leftarrow M$  charge transfer, involving the Au 5d orbitals and the dithiocarbamate  $\pi^*$ -system (first case abovementioned), or an electron transfer of the type  $u \leftarrow g$  from a 4p orbital of the halide ligands to the lowest unfilled 5d orbital (second case).<sup>42</sup> The band V is a weak absorption and it is easily detected in dibromido derivatives since it appears as a shoulder of the CT transition (band IV). It is attributable to the three allowed d-d transitions  $^1A_{1g} \rightarrow ^1A_{2g}$ ,  $^1A_{1g} \rightarrow ^1B_{1g}$  and  $^1A_{1g} \rightarrow ^1E_g$ .<sup>41, 43</sup>

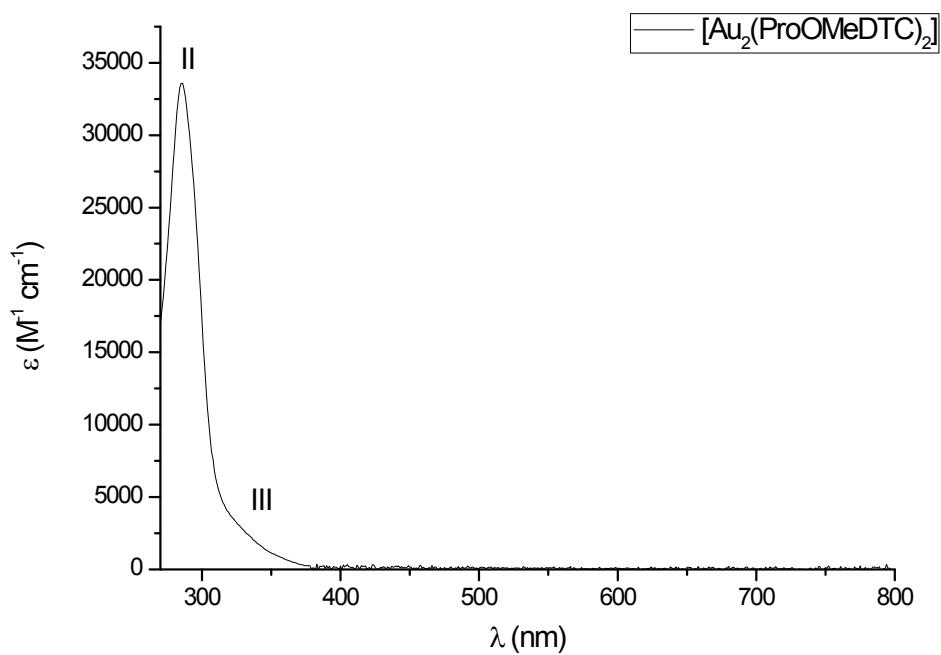

**Fig. SI 26** UV-Vis spectrum (DMSO, 25 °C) of bis(L-proline methyl ester dithiocarbamate)digold(I),  $[\text{Au}_2(\text{ProOMeDTC})_2]$  (1).

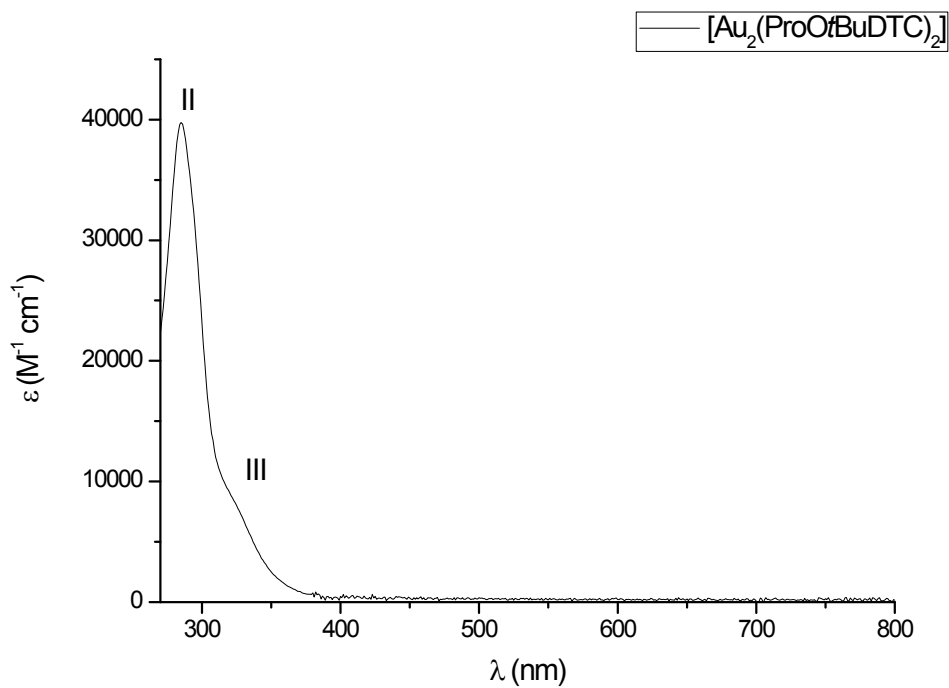

**Fig. SI 27** UV-Vis spectrum (DMSO, 25 °C) of bis(L-proline *tert*-butyl ester dithiocarbamate)digold(I),  $[\text{Au}_2(\text{ProOtBuDTC})_2]$  (2).

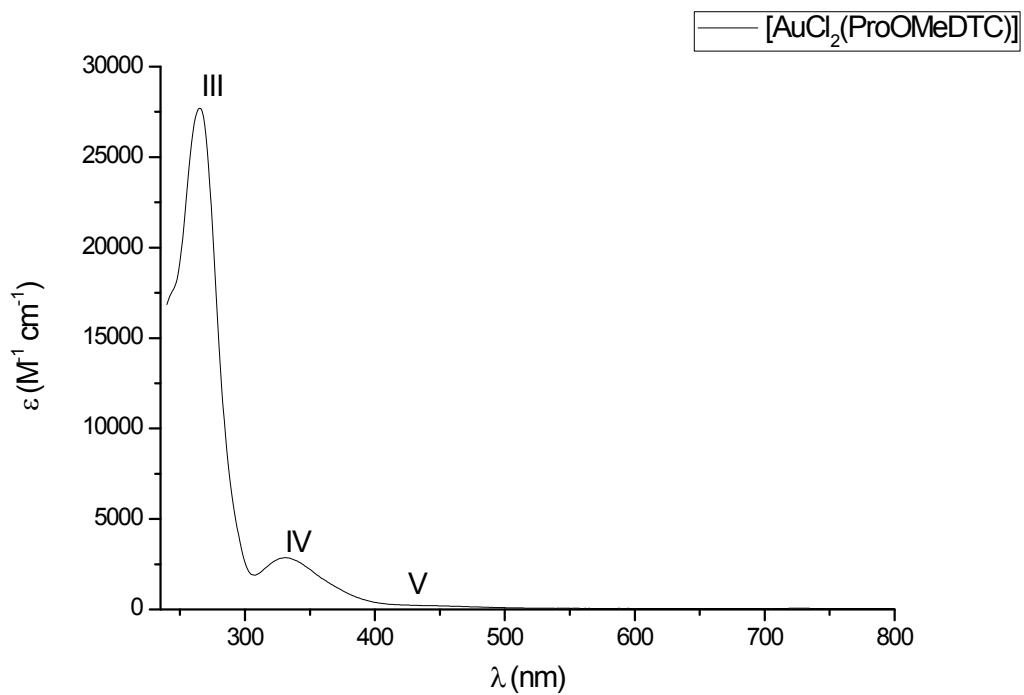

**Fig. SI 28** UV-Vis spectrum ( $\text{CH}_2\text{Cl}_2$ , 25 °C) of dichloro(L-proline methyl ester dithiocarbamate)gold(III),  $[\text{AuCl}_2(\text{ProOMeDTC})]$  (**3**).

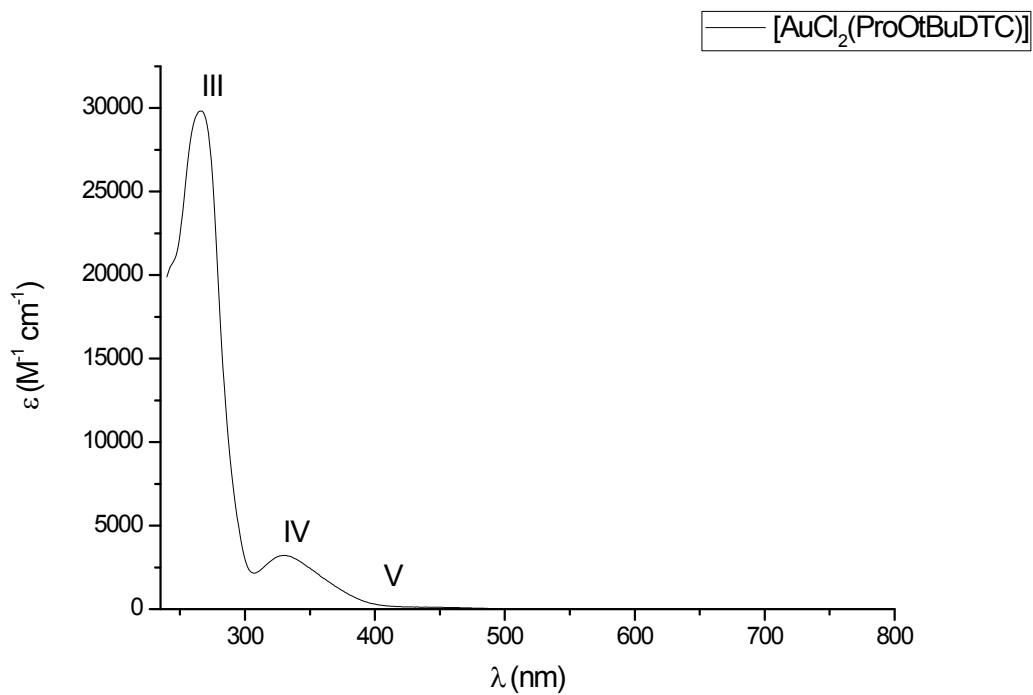

**Fig. SI 29** UV-Vis spectrum ( $\text{CH}_2\text{Cl}_2$ , 25 °C) of dichloro(L-proline *tert*-butyl ester dithiocarbamate)gold(III),  $[\text{AuCl}_2(\text{ProOtBuDTC})]$  (**4**).



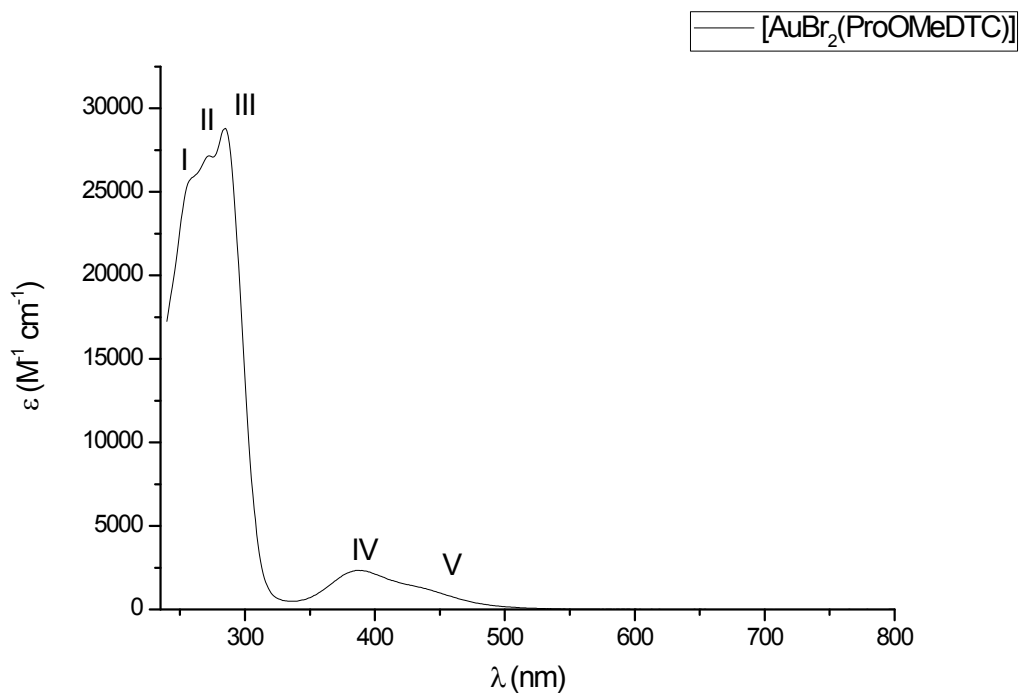

**Fig. SI 30** UV-Vis spectrum ( $\text{CH}_2\text{Cl}_2$ , 25 °C) of dibromo(L-proline methyl ester dithiocarbamate)gold(III),  $[\text{AuBr}_2(\text{ProOMeDTC})]$  (5).

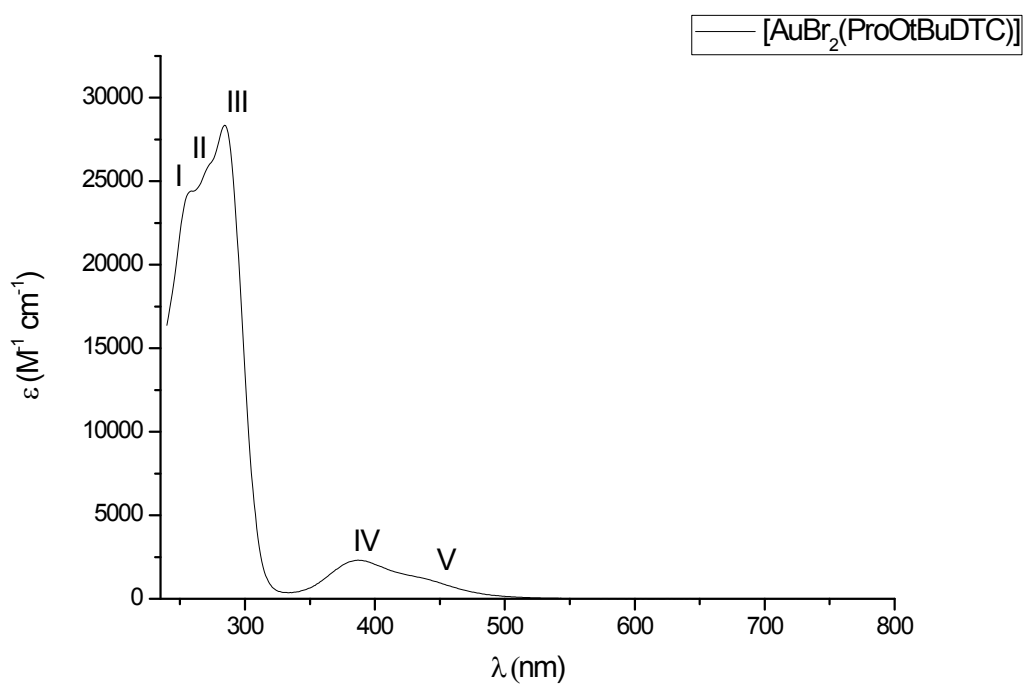

**Fig. SI 31** UV-Vis spectrum ( $\text{CH}_2\text{Cl}_2$ , 25 °C) of dibromo(L-proline *tert*-butyl ester dithiocarbamate)gold(III),  $[\text{AuBr}_2(\text{ProOtBuDTC})]$  (6).

## UV-Vis stability studies

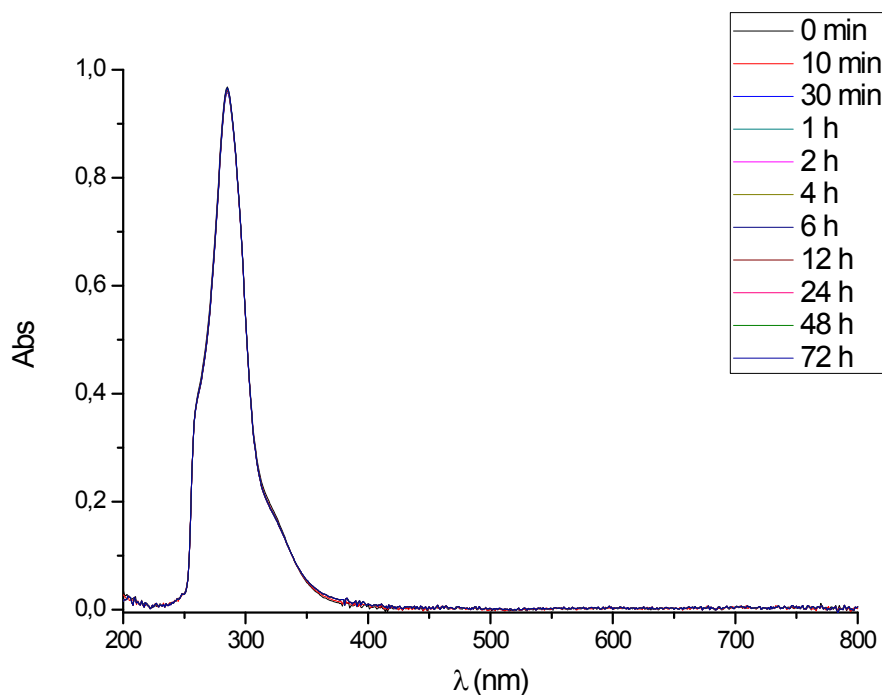

**Fig. SI 32** UV-Vis stability study (DMSO/H<sub>2</sub>O 1:9, 37 °C, 72 h) of bis(L-proline methyl ester dithiocarbamate)digold(I), [Au<sub>2</sub>(ProOMeDTC)<sub>2</sub>] (**1**).

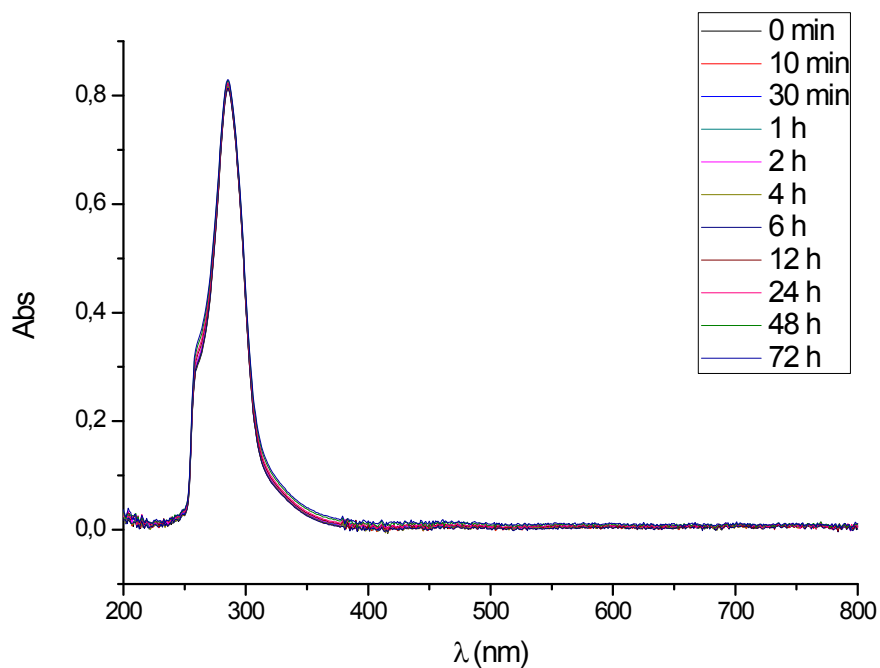

**Fig. SI 33** UV-Vis stability study (DMSO/H<sub>2</sub>O 1:9, 37 °C, 72 h) of bis(L-proline *tert*-butyl ester dithiocarbamate)digold(I), [Au<sub>2</sub>(ProOtBuDTC)<sub>2</sub>] (**2**).

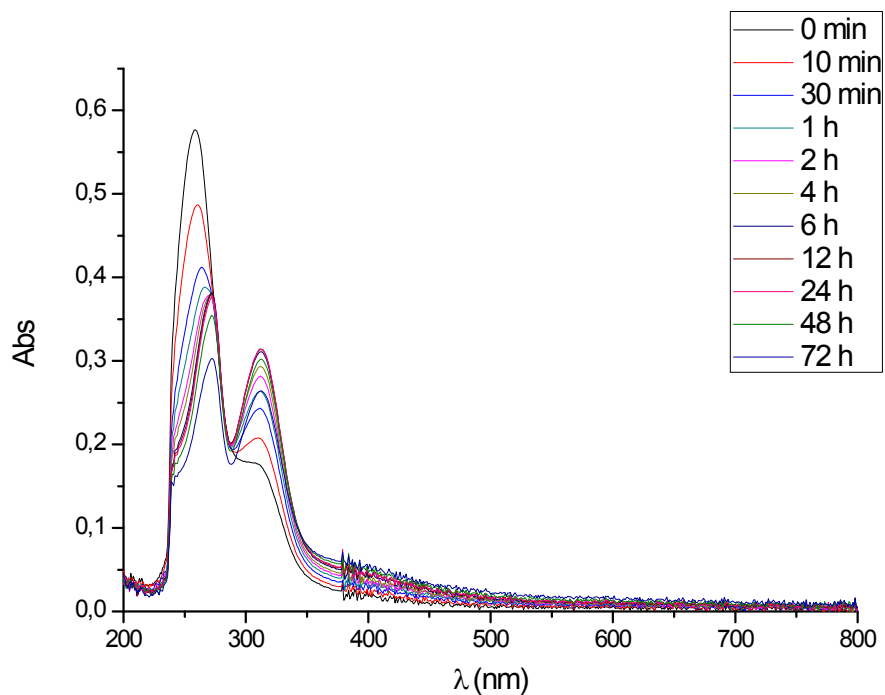

**Fig. SI 34** UV-Vis stability study (DMSO/H<sub>2</sub>O 1:9, 37 °C, 72 h) of dichloro(L-proline methyl ester dithiocarbamate)gold(III),  $[\text{AuCl}_2(\text{ProOMeDTC})]$  (3).

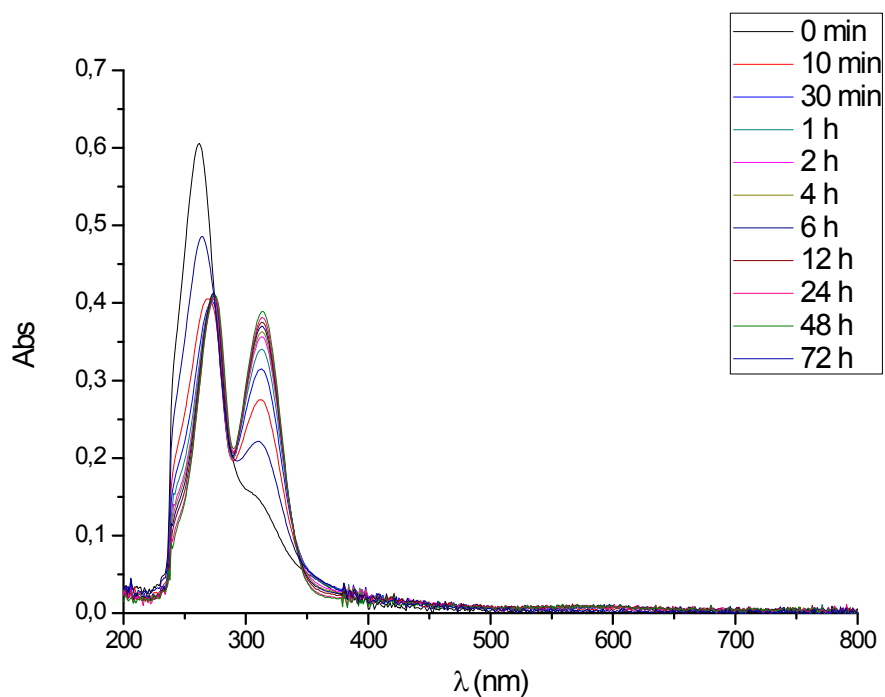

**Fig. SI 35** UV-Vis stability study (DMSO/H<sub>2</sub>O 1:9, 37 °C, 72 h) of dichloro(L-proline *tert*-butyl ester dithiocarbamate)gold(III),  $[\text{AuCl}_2(\text{ProOtBuDTC})]$  (4).

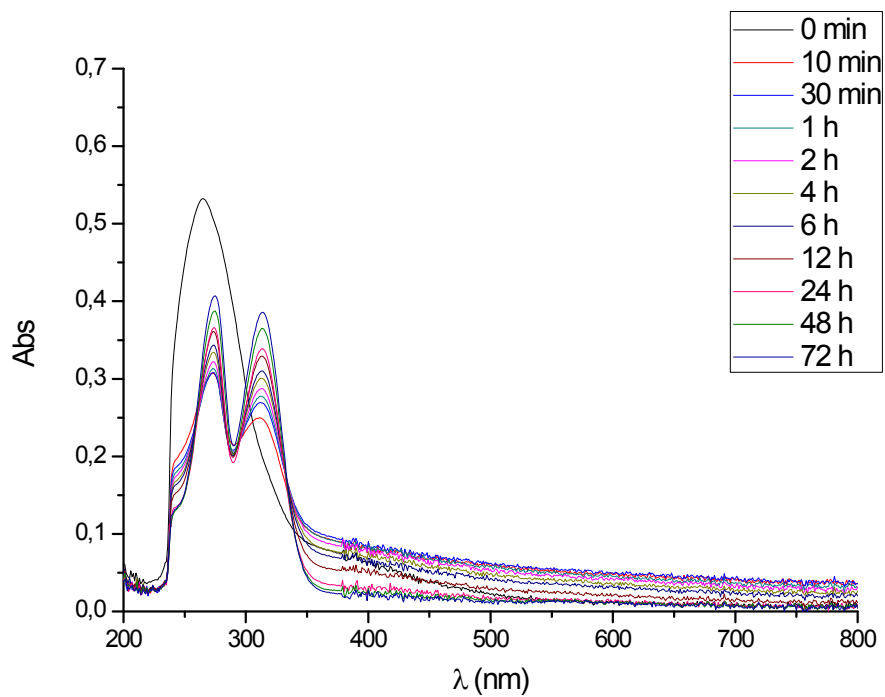

**Fig. SI 36** UV-Vis stability study (DMSO/H<sub>2</sub>O 1:9, 37 °C, 72 h) of dibromo(L-proline *tert*-butyl ester dithiocarbamate)gold(III), [AuBr<sub>2</sub>(ProOtBuDTC)] (6).

## CD interaction studies

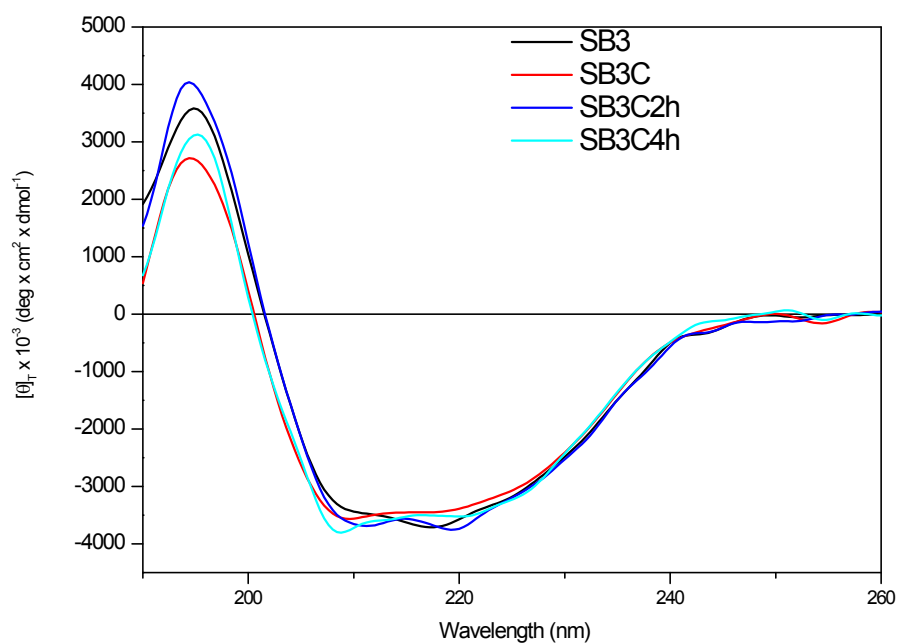

**Fig. SI 37** Far-UV CD spectra of Serpin SB3 in presence of complex 3 (SB3C) at different times. [Red: time 0 (SB3C); blue: after 2 h(SB3C2h); light blue: after 4h (SB3C4h)].

|         | Helix (%) | B-sheet (%) | Turn (%) | Other (%) |
|---------|-----------|-------------|----------|-----------|
| SB3     | 98.0      | 0           | 2.0      | 0.0       |
| SB3C    | 80.9      | 0           | 3.7      | 15.4      |
| SB3C 2h | 91.2      | 0           | 1.0      | 7.8       |
| SB3C 4h | 94.3      | 0           | 0.0      | 5.7       |

**Table SI 4** Protein Secondary structure estimation determined using Jasco CD Multivariate SSE software.

## Immunofluorescence analysis of SerpinB3 expression

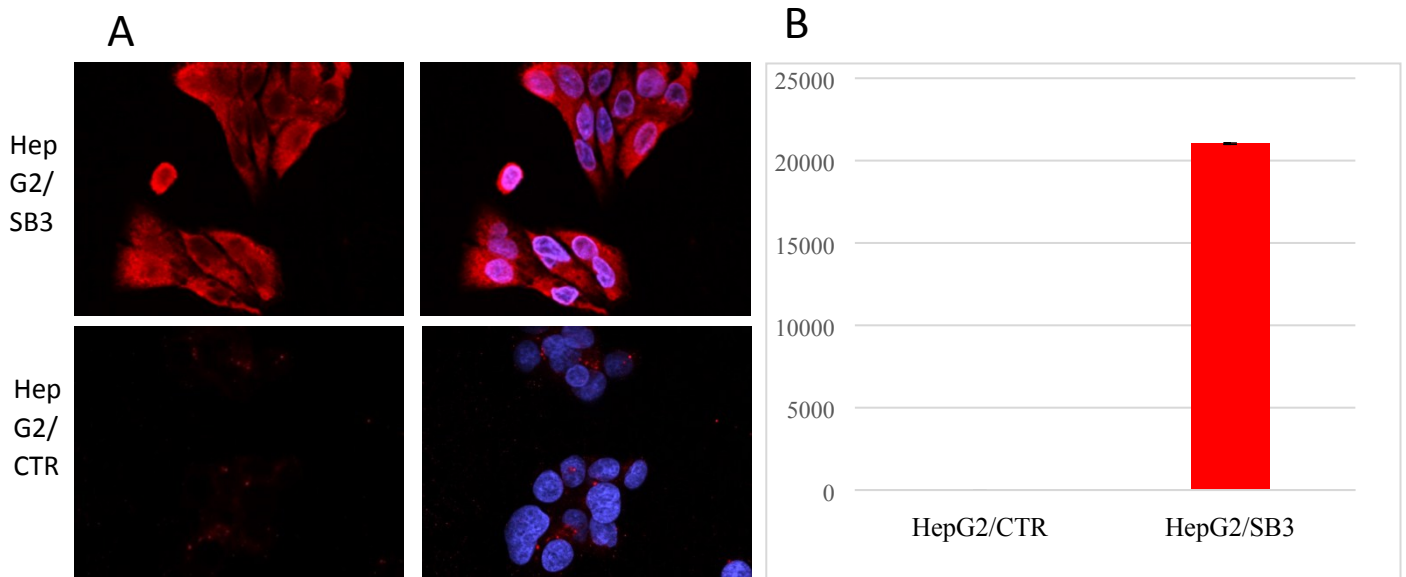

**Fig. SI 38** A. Immunofluorescence analysis of SerpinB3 expression (63x objective) in SerpinB3 transfected HepG2 (HepG2/SB3) and in empty vector transfected HepG2 cells (HepG2/CTR). The cells were immunostained with anti-SerpinB3 antibody and the nuclei were counterstained with DAPI. Images were obtained by fluorescence microscopy Axiovert 200 with Apotome 2 (Zeiss). B. Analysis of SerpinB3 transcripts in HepG2/SB3 transfected cells and in HepG2/CTR cells by quantitative real-time PCR (Q-PCR).

## Anticancer activity in complete medium containing proline.

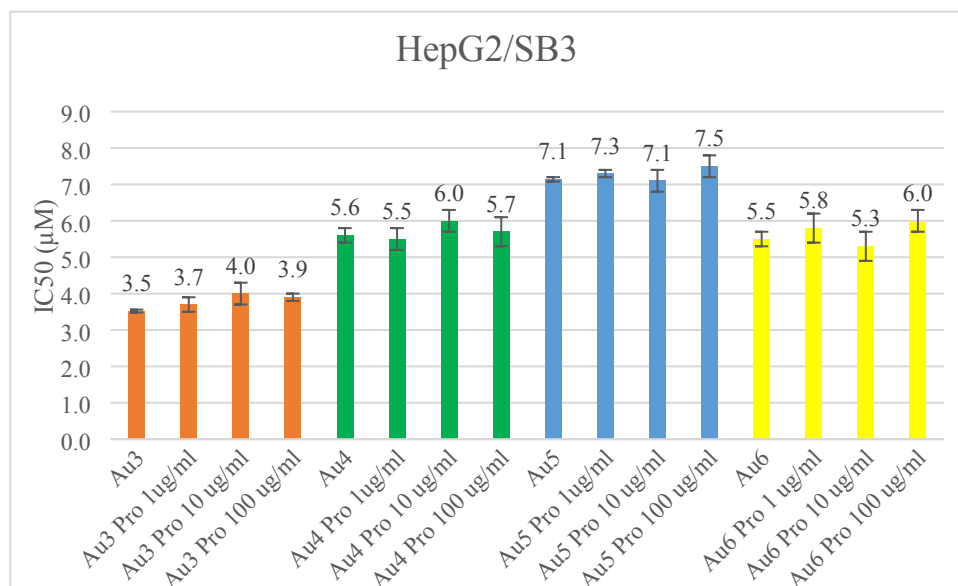

**Figure SI 39** IC<sub>50</sub> values (µM) (concentration of the test agent inducing 50% reduction in cell number compared with control cell cultures) calculated after a 72-h treatment obtained on HepG2/SB3 cell with the compounds 3, 4, 5, 6 also in presence of complete medium containing proline at 1, 10, and 100 µg/ml concentration. Vehicle: DMSO
